# Supplementary material for: CoPt/CeO 2 catalysts for the growth of narrow diameter semiconducting single-walled carbon nanotubes
Source: Royal Society of Chemistry journal article supplement (doi:10.1039/c5nr05616k), 2015-01-01
Supplement: c5nr05616k1.pdf [file c5nr05616k1.pdf]

## Supporting Information

### **CoPt/CeO<sub>2</sub> Catalysts for Growth of Narrow Diameter Semiconducting Single-walled Carbon Nanotubes**

Lei Tang,<sup>a,b</sup> Taotao Li,<sup>a</sup> Chaowei Li,<sup>a,b</sup> Lin Ling,<sup>a</sup> Kai Zhang,<sup>a</sup> Yagang Yao<sup>\*a</sup>

<sup>a</sup>Division of Advanced Nanomaterials, Key Laboratory of Nanodevices and Applications, Suzhou Institute of Nano-tech and Nano-bionics, Chinese Academy of Sciences, University of Chinese Academy of Sciences, Suzhou 215123, China

<sup>b</sup>School of Sciences, Shanghai University, Shanghai 200444, China

\*To whom correspondence should be addressed: [ygyao2013@sinano.ac.cn](mailto:ygyao2013@sinano.ac.cn)

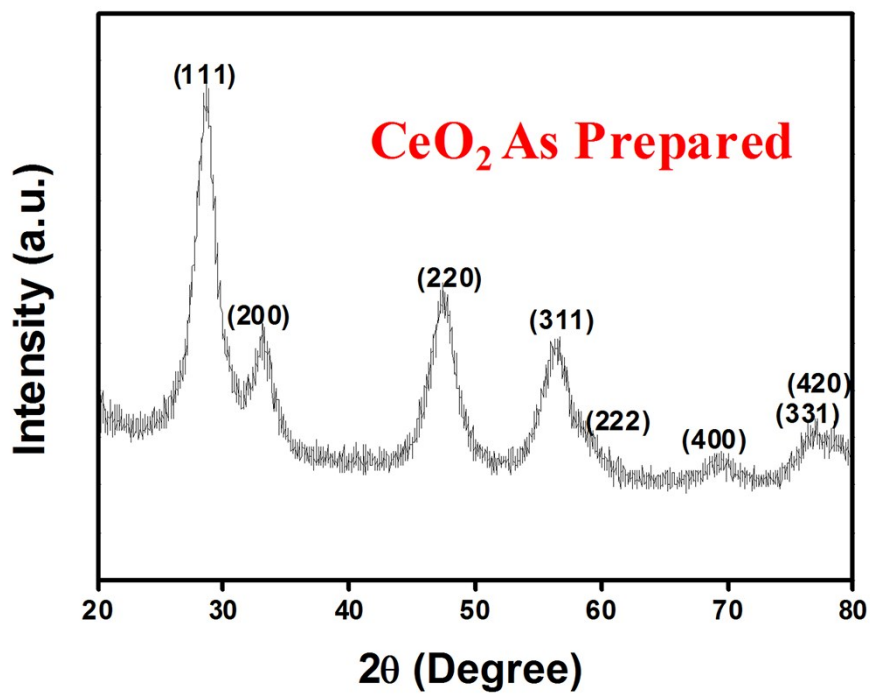

Figure S1. XRD of mesoporous CeO<sub>2</sub>.

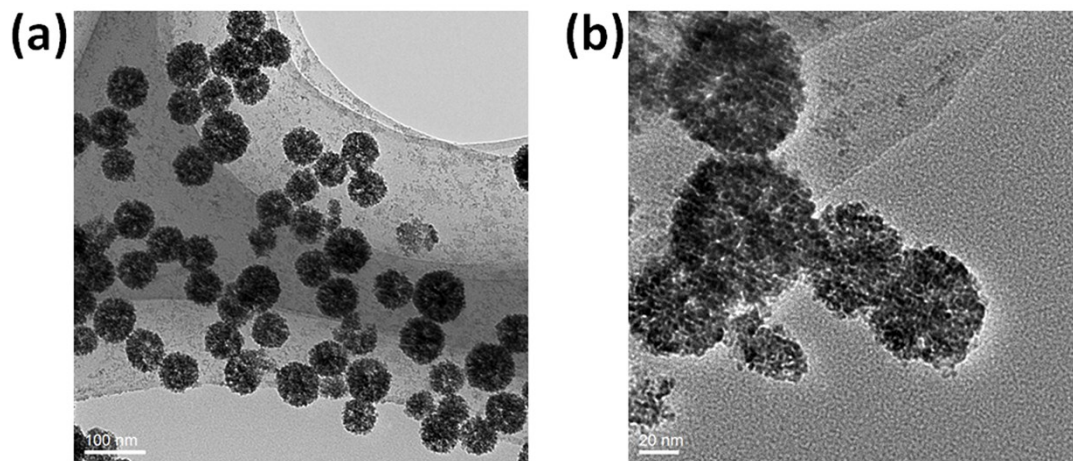

**Figure S2.** Typical TEM images of mesoporous CeO<sub>2</sub>. (a) The low magnification. (b) The high magnification.

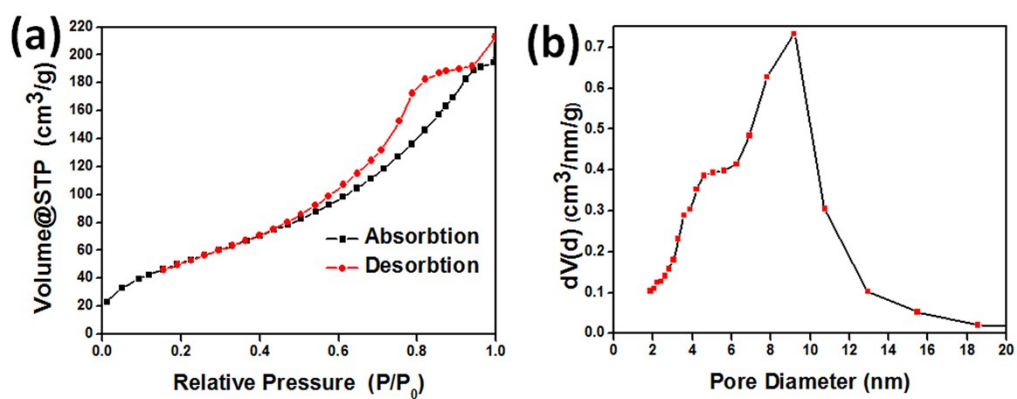

**Figure S3.** (a) N<sub>2</sub> adsorption and desorption isotherms of mesoporous CeO<sub>2</sub>. (b) B-J-H pore size distribution curves of mesoporous CeO<sub>2</sub>.

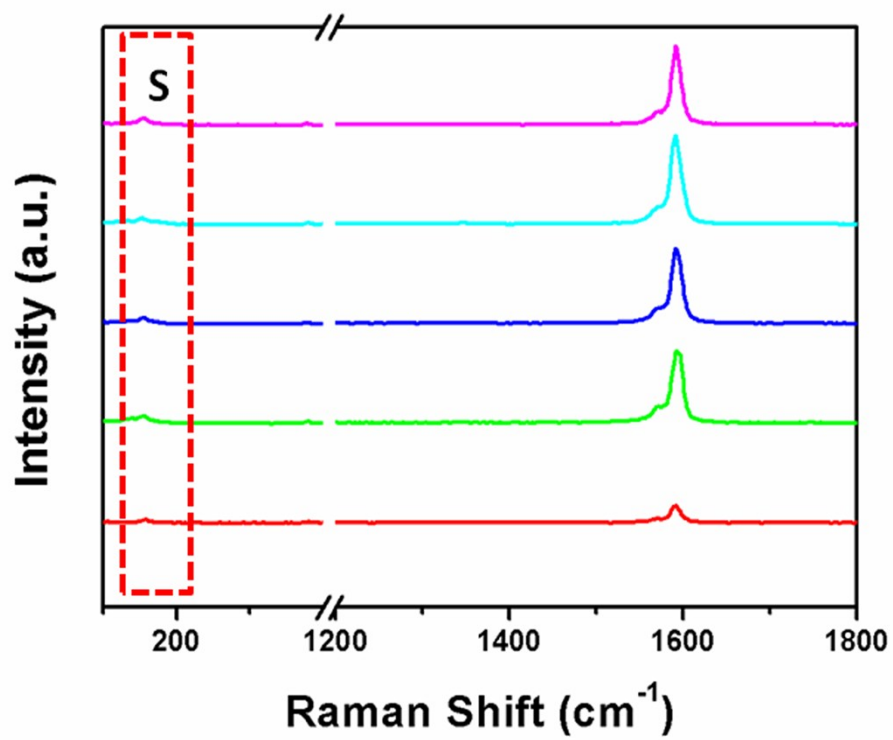

**Figure S4.** The RBM peak and G bands from the as-grown SWNTs using the uniform CoPt/CeO<sub>2</sub> catalysts show the as-grown SWNTs are s-SWNTs. The excitation wavelength is 532 nm.

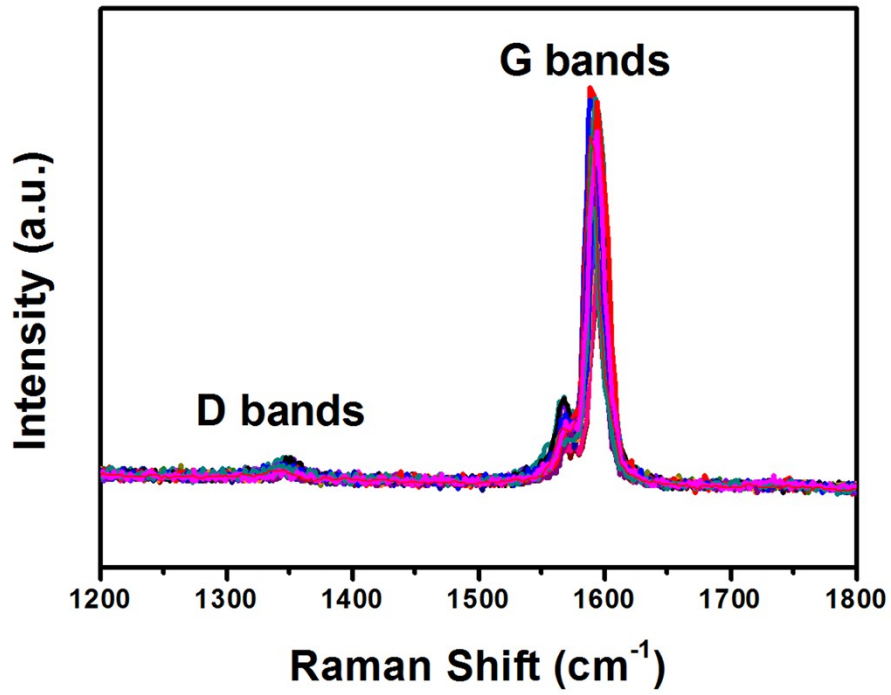

**Figure S5.** Typical Raman D band and G band of the as-grown SWNTS under the CVD process as described.

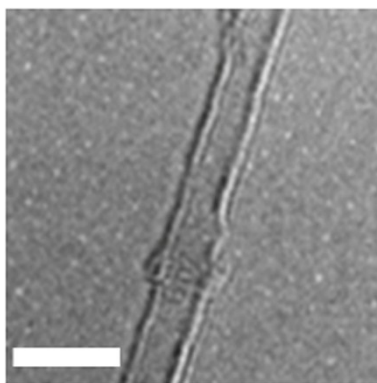

**Figure S6.** Typical TEM image of as-grown SWNTs. The scale bar is 2 nm.

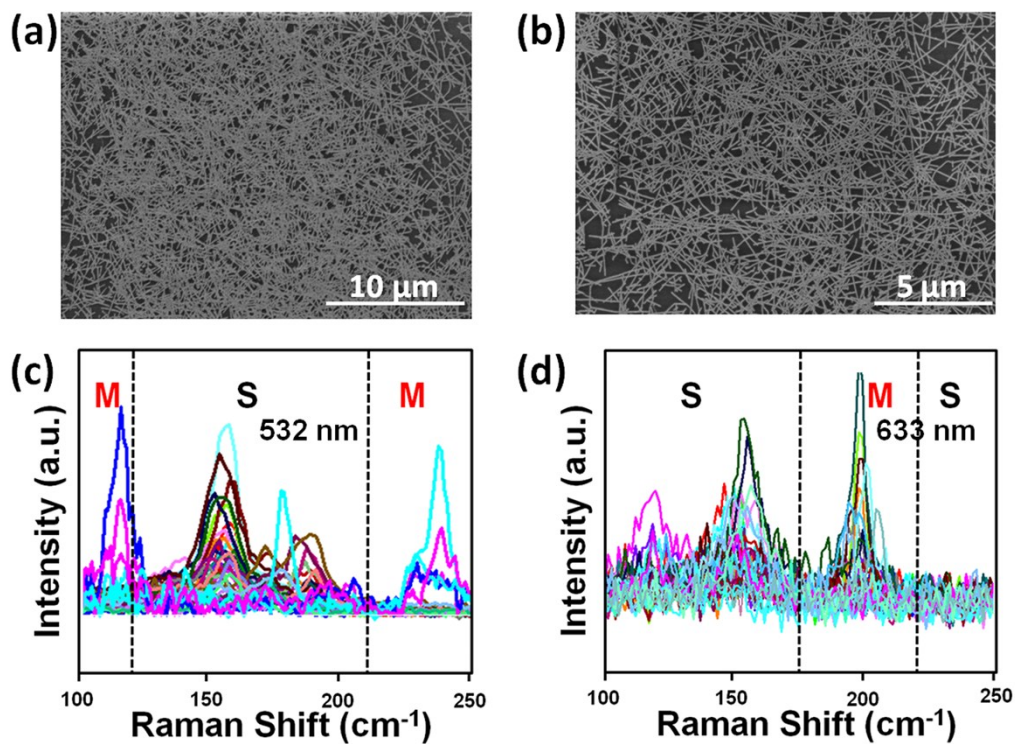

**Figure S7.** (a) and (b) SEM images of the SWNTs using CoPt bimetallics as catalysts; (c) and (d) RBM peaks for the as-grown SWNTs samples with 532 nm and 633 nm wavelength excitation, respectively. Peaks within the dashed zones marked with S corresponded to s-SWNTs, and M denoted m-SWNTs.



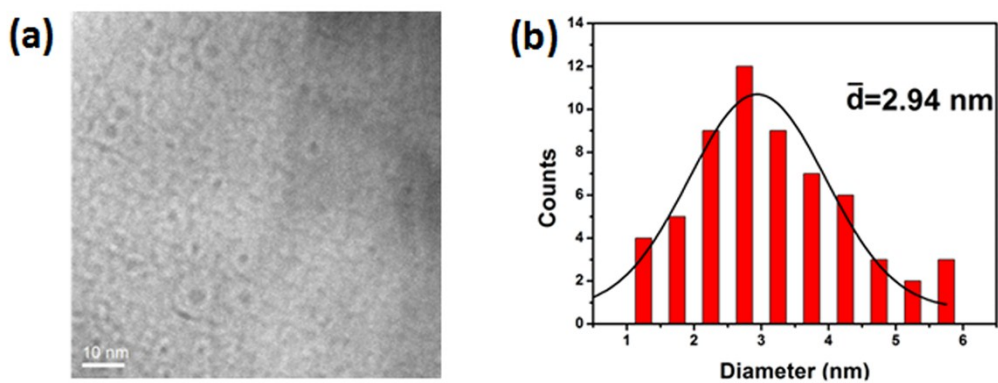

**Figure S8.** (a) Typical TEM image of CoPt/CeO<sub>2</sub> catalysts. (b) The histogram of the diameter for the CoPt bimetallic catalysts size. Mesoporous CeO<sub>2</sub> was prepared by hydrothermal method. Then, CoPt/CeO<sub>2</sub> was synthesized by impregnation method using Co(Ac)<sub>2</sub>·4H<sub>2</sub>O and H<sub>2</sub>PtCl<sub>6</sub>·6H<sub>2</sub>O ethanol solution as catalyst precursors, mesoporous CeO<sub>2</sub> as the catalyst supports. The TEM image in **Figure S8b** in the revised manuscript just shows CoPt particles with average size of 2.94 nm. The background in **Figure S8a** is partial section of the CeO<sub>2</sub> support. The full image of CeO<sub>2</sub> support is displayed in **Figure S2**.

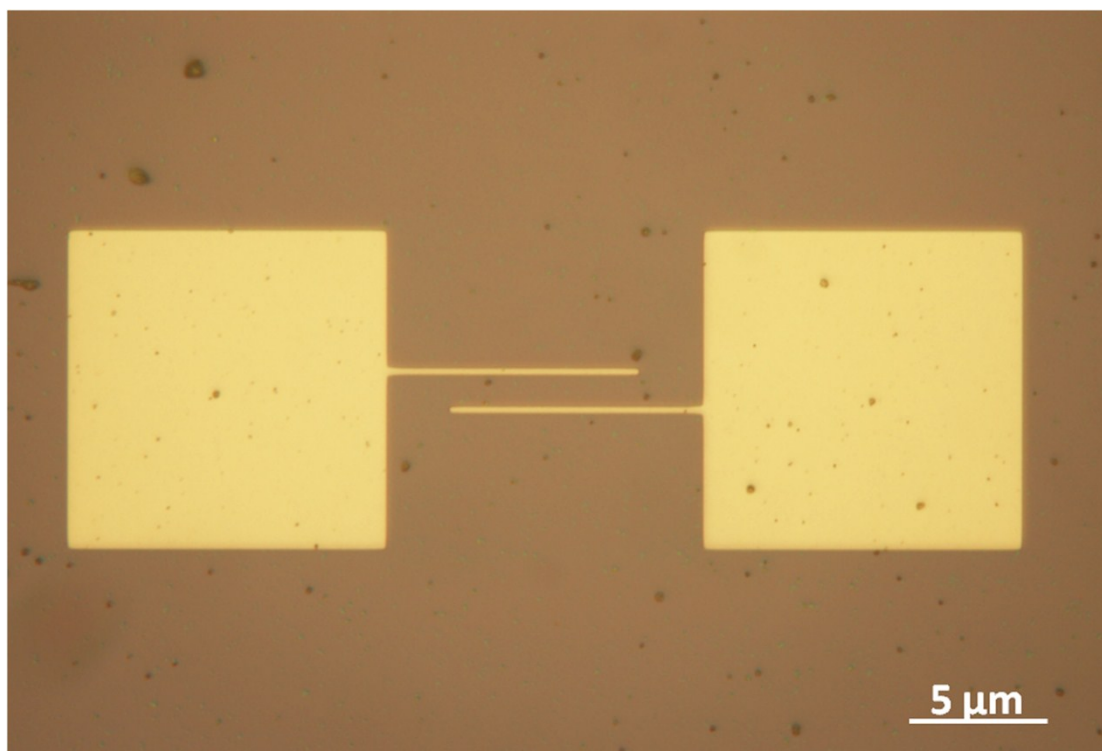

**Figure S9.** Typical optical microscope image of the as-fabricated FET device.

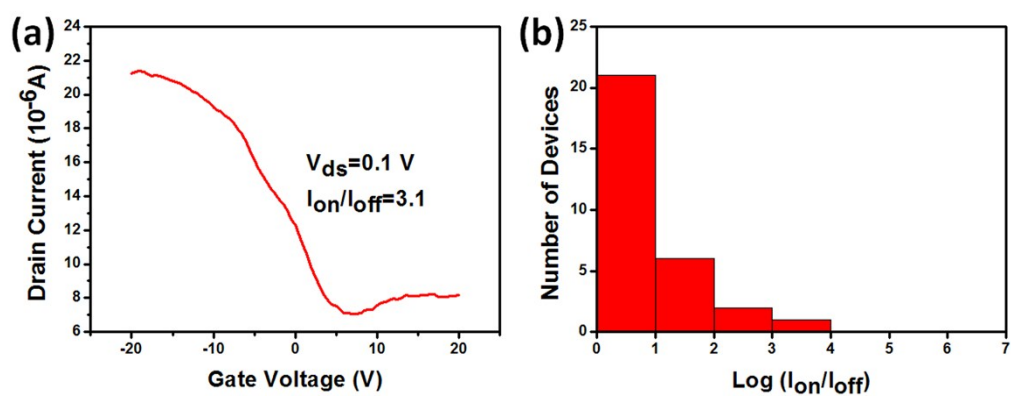

**Figure S10.** (a) Typical transfer characteristic curve of as-fabricated device with  $V_{ds}=100$  mV using the as-grown SWNTs by CoPt bimetallic catalysts. (b) Histogram of the  $I_{on}/I_{off}$  ratio for as-fabricated device using the as-grown SWNTs by CoPt bimetallic catalysts.
